# Supplementary material
Source: PubMed Central journal article supplement (PMC6933862)
Supplement: PRO-29-184-s001.pdf [file PRO-29-184-s001.pdf]

# Supplementary Information for “DISOselect: disorder predictor selection at the protein level”

Akila Katuwawala<sup>1</sup>, Christopher Oldfield<sup>1</sup>, and Lukasz Kurgan<sup>1\*</sup>

<sup>1</sup>Department of Computer Science, Virginia Commonwealth University

\*corresponding author:

Department of Computer Science, Virginia Commonwealth University, 401 West Main Street, Room E4225, Richmond, Virginia 23284, USA

Email: lkurgan@vcu.edu; Phone: (804) 827-3986

**Supplementary Table S1.** Description of the 130 features that were considered in the design of DISOselect.

| Category                                     | Feature name                     | Description                                          | Source                      |
|----------------------------------------------|----------------------------------|------------------------------------------------------|-----------------------------|
| Amino Acid composition (20 features)         | Alanine Content                  | Fraction of Alanine in the input protein chain       | Input sequence              |
|                                              | Leucine Content                  | Fraction of Leucine in the input protein chain       | Input sequence              |
|                                              | Arginine Content                 | Fraction of Arginine in the input protein chain      | Input sequence              |
|                                              | Asparagine Content               | Fraction of Asparagine in the input protein chain    | Input sequence              |
|                                              | Aspartic Content                 | Fraction of Aspartic acid in the input protein chain | Input sequence              |
|                                              | Cysteine Content                 | Fraction of Cysteine in the input protein chain      | Input sequence              |
|                                              | Glutamic Content                 | Fraction of Glutamic acid in the input protein chain | Input sequence              |
|                                              | Glutamine Content                | Fraction of Glutamine in the input protein chain     | Input sequence              |
|                                              | Glycine Content                  | Fraction of Glycine in the input protein chain       | Input sequence              |
|                                              | Histidine Content                | Fraction of Histidine in the input protein chain     | Input sequence              |
|                                              | Isoleucine Content               | Fraction of Isoleucine in the input protein chain    | Input sequence              |
|                                              | Lysine Content                   | Fraction of Lysine in the input protein chain        | Input sequence              |
|                                              | Methionine Content               | Fraction of Methionine in the input protein chain    | Input sequence              |
|                                              | Phenylalanine Content            | Fraction of Phenylalanine in the input protein chain | Input sequence              |
|                                              | Proline Content                  | Fraction of Proline in the input protein chain       | Input sequence              |
|                                              | Serine Content                   | Fraction of Serine in the input protein chain        | Input sequence              |
|                                              | Threonine Content                | Fraction of Threonine in the input protein chain     | Input sequence              |
|                                              | Tryptophan Content               | Fraction of Tryptophan in the input protein chain    | Input sequence              |
|                                              | Tyrosine Content                 | Fraction of Tyrosine in the input protein chain      | Input sequence              |
|                                              | Valine Content                   | Fraction of Valine in the input protein chain        | Input sequence              |
| Predicted Solvent Accessibility (3 features) | Total accessible surface area    | Sum of solvent accessibility of all residues         | Predicted with ASAquick (2) |
|                                              | Average accessible surface area  | Average of solvent accessibility of all residues     | Predicted with ASAquick (2) |
|                                              | Total number of exposed residues | Sum of binary exposed residues                       | Predicted with ASAquick (2) |

|                                                        |                                                |                                                                           |                                        |
|--------------------------------------------------------|------------------------------------------------|---------------------------------------------------------------------------|----------------------------------------|
| Sequence Complexity (2 features)                       | Fraction of complex regions                    | Number of complex regions divided by chain length                         | Computed by SEG (4)                    |
|                                                        | Fraction of complex residues                   | Number of complex residues divided by chain length                        | Computed by SEG (4)                    |
| Predicted Secondary Structure (8 features)             | Count of coils                                 | Count of putative coil residues in protein                                | Predicted with PSIPRED (1)             |
|                                                        | Count of helices                               | Count of putative helix residues in protein                               | Predicted with PSIPRED (1)             |
|                                                        | Count of strands                               | Count of putative strand residues in protein                              | Predicted with PSIPRED (1)             |
|                                                        | Count of coils and strands                     | Count of putative coil and strand residues in protein                     | Predicted with PSIPRED (1)             |
|                                                        | Content of coils                               | Fraction of putative coil residues in the input protein chain             | Predicted with PSIPRED (1)             |
|                                                        | Content of helices                             | Fraction of putative helix residues in the input protein chain            | Predicted with PSIPRED (1)             |
|                                                        | Content of strands                             | Fraction of putative strands residues in the input protein chain          | Predicted with PSIPRED (1)             |
|                                                        | Content of coils and strands                   | Fraction of putative coils and strand residues in the input protein chain | Predicted with PSIPRED (1)             |
| Physiochemical properties of amino acids (97 features) | Summed hydropathy                              | Sum of hydropathy values of all residues                                  | Extracted from AAindex (3): KYTJ820101 |
|                                                        | Summed net charge                              | Sum of net charge values of all residues                                  | Extracted from AAindex (3): KLEP840101 |
|                                                        | Summed hydrophilicity                          | Sum of hydrophilicity values of all residues of all residues              | Extracted from AAindex (3): HOPT810101 |
|                                                        | Average hydrophilicity                         | Sum of hydrophilicity values divided by chain length                      | Extracted from AAindex (3): HOPT810101 |
|                                                        | Average absolute entropy                       | Sum of absolute entropy values divided by chain length                    | Extracted from AAindex (3): HUTJ700102 |
|                                                        | Average unfolding gibbs energy                 | Sum of unfolding Gibbs energy values divided by chain length              | Extracted from AAindex (3): YUTK870101 |
|                                                        | Average beta coils                             | Sum of beta-structure-coil equilibrium constants divided by chain length  | Extracted from AAindex (3): OOBM850101 |
|                                                        | Average reverse turns                          | Sum of propensities to form reverse turn divided by chain length          | Extracted from AAindex (3): OOBM850102 |
|                                                        | Summed transfer energy                         | Sum of transfer energy parameters of all residues                         | Extracted from AAindex (3): OOBM850103 |
|                                                        | Average Isoelectricity                         | Sum of isoelectric points divided by chain length                         | Extracted from AAindex (3): ZIMJ680104 |
|                                                        | Sequence complexity                            | Sum of composite amino acid of all residues                               | Raw sequence                           |
|                                                        | Summed hydrophobicity                          | Sum of hydrophobicity values of all residues                              | Extracted from AAindex (3): PRAM900101 |
|                                                        | Average hydrophobicity                         | Sum of hydrophobicity values divided by chain length                      | Extracted from AAindex (3): PRAM900101 |
|                                                        | Average hydropathy                             | Sum of hydropathy values divided by chain length                          | Extracted from AAindex (3): KYTJ820101 |
|                                                        | Summed solvation free energy                   | Sum of solvation free energy values of all residues                       | Extracted from AAindex (3): EISD860101 |
|                                                        | Average solvation free energy                  | Sum of solvation free energy values divided by chain length               | Extracted from AAindex (3): EISD860101 |
|                                                        | Summed polarity                                | Sum of polarity values of all residues                                    | Extracted from AAindex (3): GRAR740102 |
|                                                        | Average polarity                               | Sum of polarity values divided by chain length                            | Extracted from AAindex (3): GRAR740102 |
|                                                        | Summed volume                                  | Sum of volume values of all residues                                      | Extracted from AAindex (3): GRAR740103 |
|                                                        | Average volume                                 | Sum of volume values divided by chain length                              | Extracted from AAindex (3): GRAR740103 |
| Summed absolute entropy                                | Sum of absolute entropy values of all residues | Extracted from AAindex (3): HUTJ700102                                    |                                        |

|                                             |                                                                                    |                                        |
|---------------------------------------------|------------------------------------------------------------------------------------|----------------------------------------|
| Summed unfolding gibbs                      | Sum of unfolding Gibbs energy in water of all residues                             | Extracted from AAindex (3): YUTK870101 |
| Summed activation gibbs                     | Sum of activation Gibbs energy values of all residues                              | Extracted from AAindex (3): KLEP840101 |
| Average activation gibbs                    | Sum of activation Gibbs energy values divided by chain length                      | Extracted from AAindex (3): KLEP840101 |
| Summed beta coils                           | Sum of beta-structure-coil equilibrium constants of all residues                   | Extracted from AAindex (3): OOBM850101 |
| Summed reverse turn                         | Sum of propensity to form reverse turn values of all residues                      | Extracted from AAindex (3): OOBM850102 |
| Average transfer energy                     | Sum of transfer energy parameters divided by chain length                          | Extracted from AAindex (3): OOBM850103 |
| Summed isoelectric points                   | Sum of isoelectric points values of all residues                                   | Extracted from AAindex (3): ZIMJ680104 |
| Summed charge transfer                      | Sum of parameter of charge transfer capability of all residues                     | Extracted from AAindex (3): CHAM830107 |
| Summed charge donor                         | Sum of parameter of charge donor capability of all residues                        | Extracted from AAindex (3): CHAM830108 |
| Summed positive charge                      | Sum of parameter of positive charge capability of all residues                     | Extracted from AAindex (3): CHAM830108 |
| Summed negative charge                      | Sum of parameter of negative charge capability of all residues                     | Extracted from AAindex (3): CHAM830108 |
| Summed hydrophobicity index                 | Sum of hydrophobicity Index values of all residues                                 | Extracted from AAindex (3): ARGP820101 |
| Average hydrophobicity index                | Sum of hydrophobicity Index values divided by chain length                         | Extracted from AAindex (3): ARGP820101 |
| Summed alpha hydrophobicity                 | Sum of normalized hydrophobicity scales for alpha-proteins of all residues         | Extracted from AAindex (3): CIDH920101 |
| Average alpha hydrophobicity                | Sum of normalized hydrophobicity scales for alpha-proteins divided by chain length | Extracted from AAindex (3): CIDH920101 |
| Summed normalized average hydrophobicity    | Sum of normalized average hydrophobicity scales of all residues                    | Extracted from AAindex (3): CIDH920105 |
| Average normalized average hydrophobicity   | Sum of Normalized average hydrophobicity scales divided by chain length            | Extracted from AAindex (3): CIDH920105 |
| Summed consensus normalized hydrophobicity  | Sum of consensus normalized hydrophobicity scales of all residues                  | Extracted from AAindex (3): EISD840101 |
| Average consensus normalized hydrophobicity | Sum of Consensus normalized hydrophobicity scales divided by chain length          | Extracted from AAindex (3): EISD840101 |
| Summed average surrounding hydrophobicity   | Sum of average surrounding hydrophobicity values of all residues                   | Extracted from AAindex (3): MANP780101 |
| Average surrounding hydrophobicity          | Sum of average surrounding hydrophobicity values divided by chain length           | Extracted from AAindex (3): MANP780101 |
| Summed hydrophobicityPH3                    | Sum of hydrophobicity index values at 3.0 pH of all residues                       | Extracted from AAindex (3): COWR900101 |

|                                               |                                                                                                                           |                                        |
|-----------------------------------------------|---------------------------------------------------------------------------------------------------------------------------|----------------------------------------|
| Average hydrophobicityPH3                     | Sum of hydrophobicity index values at 3.0 pH divided by chain length                                                      | Extracted from AAindex (3): COWR900101 |
| Summed native hydrophobicity                  | Sum of native hydrophobicity index values of all residues                                                                 | Extracted from AAindex (3): CASG920101 |
| Average native hydrophobicity                 | Sum of native Hydrophobicity index values divided by chain length                                                         | Extracted from AAindex (3): CASG920101 |
| Disorder complexity                           | Fraction of disorder promoting amino acids in the input protein chain                                                     | Input sequence                         |
| Order complexity                              | Fraction of order promoting amino acids in the input protein chain                                                        | Input sequence                         |
| Charge to hydropathy ratio                    | Total charge of a protein as ratio of total hydropathy of all residues                                                    | Calculated AA index                    |
| Disorder complexity to order complexity ratio | Ratio between disorder promoting amino acids fraction and order promoting amino acids fraction in the input protein chain | Input sequence                         |
| Summed mass                                   | Sum of masses of all residues                                                                                             | Input sequence                         |
| Average mass                                  | Sum of masses divided by chain length                                                                                     | Input sequence                         |
| Summed density                                | Total mass of a protein as a ratio of total volume of all residues                                                        | Calculated AA index                    |
| Average density                               | Total density of protein divided by chain length                                                                          | Calculated AA index                    |
| Length of each protein                        | Number of amino acids in the input protein chain                                                                          | Input sequence                         |
| Summed CH chemical shifts                     | Sum of alphaCH chemical shift values of all residues                                                                      | Extracted from AAindex (3): ANDN920101 |
| Average CH chemical shifts                    | Sum of alphaCH chemical shift values divided by chain length                                                              | Extracted from AAindex (3): ANDN920101 |
| Summed NH chemical shifts                     | Sum of alphaNH chemical shift values of all residues                                                                      | Extracted from AAindex (3): BUNA790101 |
| Average NH chemical shifts                    | Sum of alphaNH chemical shift values divided by chain length                                                              | Extracted from AAindex (3): BUNA790101 |
| Summed spin coupling                          | Sum of spin coupling constants of all residues                                                                            | Extracted from AAindex (3): BUNA790103 |
| Average spin coupling                         | Sum of spin coupling constants divided by chain length                                                                    | Extracted from AAindex (3): BUNA790103 |
| Summed membrane preference                    | Sum of membrane preference indexes of all residues                                                                        | Extracted from AAindex (3): DESM900101 |
| Average membrane preference                   | Sum of membrane preference indexes divided by chain length                                                                | Extracted from AAindex (3): DESM900101 |
| Summed hydrophobic moment                     | Sum of atom-based hydrophobic moment values of all residues                                                               | Extracted from AAindex (3): EISD860102 |
| Average hydrophobic moment                    | Sum of atom-based hydrophobic moment values divided by chain length                                                       | Extracted from AAindex (3): EISD860102 |
| Summed hydrophobic moment direction           | Sum of direction of hydrophobic moment values of all residues                                                             | Extracted from AAindex (3): EISD860103 |
| Average hydrophobic moment direction          | Sum of direction of hydrophobic moment values divided by chain length                                                     | Extracted from AAindex (3): EISD860103 |

|                                                 |                                                                                                 |                                        |
|-------------------------------------------------|-------------------------------------------------------------------------------------------------|----------------------------------------|
| Summed mesophilic B protein values              | Sum of B-values of mesophilic protein distributions of all residues                             | Extracted from AAindex (3): PARS000101 |
| Average mesophilic B protein values             | Sum of B-values of mesophilic protein distributions divided by chain length                     | Extracted from AAindex (3): PARS000101 |
| Summed thermophilic B protein values            | Sum of B-values of thermophilic protein distributions of all residues                           | Extracted from AAindex (3): KUMS000101 |
| Average thermophilic B protein values           | Sum of B-values of thermophilic protein distributions divided by chain length                   | Extracted from AAindex (3): KUMS000101 |
| Summed buried fractions                         | Sum of ratio of buried and accessible molar fractions of all residues                           | Extracted from AAindex (3): JANJ790101 |
| Average buried fractions                        | Sum of ratio of buried and accessible molar fractions divided by chain length                   | Extracted from AAindex (3): JANJ790101 |
| Summed normalized flexibility                   | Sum of normalized flexibility parameters of all residues                                        | Extracted from AAindex (3): VINM940103 |
| Average normalized flexibility                  | Sum of normalized flexibility parameters divided by chain length                                | Extracted from AAindex (3): VINM940103 |
| Total average normalized flexibility            | Sum of averaged normalized flexibility parameters of all residues                               | Extracted from AAindex (3): VINM940101 |
| Average normalized flexibility                  | Sum of averaged normalized flexibility parameters divided by chain length                       | Extracted from AAindex (3): VINM940101 |
| Summed beta sheet frequency                     | Sum of normalized frequency of beta-sheet values of all residues                                | Extracted from AAindex (3): PALJ810104 |
| Average beta sheet frequency                    | Sum of normalized frequency of beta-sheet values divided by chain length                        | Extracted from AAindex (3): PALJ810104 |
| Summed 14A contact values                       | Sum of 14A contact numbers of all residues                                                      | Extracted from AAindex (3): NISK860101 |
| Average 14A contact values                      | Sum of 14A contact numbers divided by chain length                                              | Extracted from AAindex (3): NISK860101 |
| Summed beta position 1 affinity                 | Sum of weights for beta-sheet at the window position of 1 of all residues.                      | Extracted from AAindex (3): QIAN880121 |
| Average beta position 1 affinity                | Sum of weights for beta-sheet at the window position of 1 divided by chain length               | Extracted from AAindex (3): QIAN880121 |
| Summed bilayer energy                           | Sum of free energies of transfer from bilayer interface to water values of all residues         | Extracted from AAindex (3): WIMW960101 |
| Average bilayer energy                          | Sum of free energies of transfer from bilayer interface to water values divided by chain length | Extracted from AAindex (3): WIMW960101 |
| Summed normalized frequency of beta structures  | Sum of normalized frequency of beta-structure values of all residues                            | Extracted from AAindex (3): NAGK730102 |
| Average normalized frequency of beta structures | Sum of normalized frequency of beta-structure values divided by chain length                    | Extracted from AAindex (3): NAGK730102 |
| Summed optimized side chains                    | Sum of side chain interaction parameter of all residues                                         | Extracted from AAindex (3): OOBM850105 |

|                                |                                                                                     |                                        |
|--------------------------------|-------------------------------------------------------------------------------------|----------------------------------------|
| Average optimized side chains  | Sum of side chain interaction parameter divided by chain length                     | Extracted from AAindex (3): OOBM850105 |
| Summed occupancy of water      | Sum of fraction of sites occupied by water of all residues                          | Extracted from AAindex (3): KRIW790102 |
| Average occupancy of water     | Sum of fraction of site occupied by water divided by chain length                   | Extracted from AAindex (3): KRIW790102 |
| Summed normalized beta sheets  | Sum of fraction of site normalized frequency of beta-sheets of all residues         | Extracted from AAindex (3): CHOP780202 |
| Average normalized beta sheets | Sum of fraction of site normalized frequency of beta-sheets divided by chain length | Extracted from AAindex (3): CHOP780202 |
| Summed refractivity            | Sum of refractivity of all residues                                                 | Extracted from AAindex (3): MCMT640101 |
| Average refractivity           | Sum of refractivity divided by chain length                                         | Extracted from AAindex (3): MCMT640101 |
| Summed bulkiness               | Sum of bulkiness of all residues                                                    | Extracted from AAindex (3): ZIMJ680102 |
| Average bulkiness              | Sum of bulkiness divided by chain length                                            | Extracted from AAindex (3): ZIMJ680102 |

**Supplementary Table S2.** Predictive performance of the considered three types of machine learning models algorithms reported based on the 3-fold cross validation experiments on the training dataset. The performance is measured with Pearson correlation coefficient (PCC), mean absolute error (MAE) and mean squared error (MSE) between the predicted and the actual AUC values. The last line shows the average values across the 12 considered disorder predictors.

| Disorder predictor                           | Nearest Neighbor regressor |              |              | Linear regressor |              |              | Extra-tree regressor |              |              |
|----------------------------------------------|----------------------------|--------------|--------------|------------------|--------------|--------------|----------------------|--------------|--------------|
|                                              | PCC                        | MAE          | MSE          | PCC              | MAE          | MSE          | PCC                  | MAE          | MSE          |
| disEMBL-465                                  | 0.211                      | 0.125        | 0.018        | 0.160            | 0.120        | 0.010        | 0.315                | 0.101        | 0.007        |
| disEMBL-HL                                   | 0.203                      | 0.141        | 0.021        | 0.244            | 0.135        | 0.011        | 0.384                | 0.123        | 0.008        |
| ESpritz-DisProt                              | 0.132                      | 0.192        | 0.016        | 0.301            | 0.181        | 0.013        | 0.411                | 0.133        | 0.011        |
| ESpritz-NMR                                  | 0.129                      | 0.136        | 0.019        | 0.152            | 0.126        | 0.009        | 0.362                | 0.114        | 0.006        |
| ESpritz-Xray                                 | 0.151                      | 0.124        | 0.017        | 0.141            | 0.111        | 0.008        | 0.296                | 0.110        | 0.006        |
| GlobPlot                                     | 0.123                      | 0.147        | 0.019        | 0.293            | 0.136        | 0.011        | 0.304                | 0.125        | 0.008        |
| IUPred-long                                  | 0.176                      | 0.202        | 0.018        | 0.193            | 0.183        | 0.012        | 0.271                | 0.169        | 0.007        |
| IUPred-short                                 | 0.242                      | 0.147        | 0.020        | 0.252            | 0.145        | 0.013        | 0.297                | 0.143        | 0.008        |
| JRONN                                        | -0.056                     | 0.209        | 0.018        | 0.127            | 0.189        | 0.011        | 0.207                | 0.177        | 0.005        |
| VSL2B                                        | 0.187                      | 0.129        | 0.017        | 0.180            | 0.127        | 0.010        | 0.328                | 0.113        | 0.006        |
| SPOT-Disorder                                | 0.124                      | 0.072        | 0.018        | 0.107            | 0.068        | 0.009        | 0.254                | 0.066        | 0.006        |
| DISOPRED3                                    | 0.191                      | 0.078        | 0.011        | 0.120            | 0.074        | 0.014        | 0.261                | 0.063        | 0.006        |
| <b>Average of the 12 disorder predictors</b> | <b>0.151</b>               | <b>0.142</b> | <b>0.018</b> | <b>0.189</b>     | <b>0.133</b> | <b>0.011</b> | <b>0.308</b>         | <b>0.120</b> | <b>0.007</b> |

**Supplementary Table S3.** Improvements in the dataset-level AUC values based on the selection of proteins using the putative AUC values generated by DISOselect for each of the 12 considered disorder predictors. The disorder predictors are sorted by their complete test dataset-level AUCs. For each disorder predictor the results on the whole test set are compared against the 75%, 50% and 25% proteins that have the highest putative AUC values. Significance of the differences between the AUCs on the whole test dataset and the AUCs for each of the three subsets was evaluated with the *t*-test for normal measurements and the Wilcoxon test otherwise; normality was tested with the Anderson-Darling test at 0.05 significance. We sampled 50% of proteins in each dataset ten times at random and compared the corresponding 10 pairs of AUCs; the resulting *p*-values are reported in the table inside the square brackets.

| Disorder predictor | Datasets |                                                     |                                                     |                                                     |
|--------------------|----------|-----------------------------------------------------|-----------------------------------------------------|-----------------------------------------------------|
|                    | Complete | Top 75% selected with DISOselect [ <i>p</i> -value] | Top 50% selected with DISOselect [ <i>p</i> -value] | Top 25% selected with DISOselect [ <i>p</i> -value] |
| SPOT-Disorder      | 0.918    | 0.942 [ $<.01$ ]                                    | 0.944 [ $<.01$ ]                                    | 0.951 [ $<.01$ ]                                    |
| DISOPRED3          | 0.915    | 0.941 [ $<.01$ ]                                    | 0.952 [ $<.01$ ]                                    | 0.958 [ $<.01$ ]                                    |
| VSL2B              | 0.839    | 0.861 [ $<.01$ ]                                    | 0.864 [ $<.01$ ]                                    | 0.893 [ $<.01$ ]                                    |
| ESpritz-Xray       | 0.812    | 0.844 [ $<.01$ ]                                    | 0.855 [ $<.01$ ]                                    | 0.867 [ $<.01$ ]                                    |
| IUPred-short       | 0.810    | 0.836 [ $<.01$ ]                                    | 0.845 [ $<.01$ ]                                    | 0.856 [ $<.01$ ]                                    |
| ESpritz-NMR        | 0.807    | 0.824 [ $<.01$ ]                                    | 0.852 [ $<.01$ ]                                    | 0.878 [ $<.01$ ]                                    |
| disEMBL-465        | 0.804    | 0.832 [ $<.01$ ]                                    | 0.844 [ $<.01$ ]                                    | 0.875 [ $<.01$ ]                                    |
| ESpritz-DisProt    | 0.782    | 0.805 [ $<.01$ ]                                    | 0.821 [ $<.01$ ]                                    | 0.842 [ $<.01$ ]                                    |
| JRONN              | 0.766    | 0.776 [ $<.01$ ]                                    | 0.789 [ $<.01$ ]                                    | 0.817 [ $<.01$ ]                                    |
| disEMBL-HL         | 0.761    | 0.799 [ $<.01$ ]                                    | 0.820 [ $<.01$ ]                                    | 0.842 [ $<.01$ ]                                    |
| IUPred-long        | 0.732    | 0.762 [ $<.01$ ]                                    | 0.777 [ $<.01$ ]                                    | 0.777 [ $<.01$ ]                                    |
| GlobPlot           | 0.630    | 0.649 [ $<.01$ ]                                    | 0.655 [ $<.01$ ]                                    | 0.667 [ $<.01$ ]                                    |

## References

1. Buchan DWA, Minneci F, Nugent TCO, Bryson K, Jones DT (2013) Scalable web services for the PSIPRED Protein Analysis Workbench. *Nucleic Acids Research* 41:W349-W357.
2. Faraggi E, Zhou Y, Kloczkowski A (2014) Accurate single-sequence prediction of solvent accessible surface area using local and global features. *Proteins* 82:3170-3176. PMID: 25204636 {Medline}
3. Kawashima S, Pokarowski P, Pokarowska M, Kolinski A, Katayama T, Kanehisa M (2008) AAindex: amino acid index database, progress report 2008. *Nucleic Acids Res* 36:D202-205. PMID: 17998252 {Medline}
4. Wootton JC (1994) Non-globular domains in protein sequences: Automated segmentation using complexity measures. *Computers & Chemistry* 18:269-285.
